# Supplementary material for: Analysis and Authentication of Avocado Oil Using High Resolution NMR Spectroscopy
Source: PubMed Central journal article supplement (PMC7828049; doi:10.3390/molecules26020310), 2021-01-09
Supplement: molecules-26-00310-s001.pdf [file molecules-26-00310-s001.pdf]

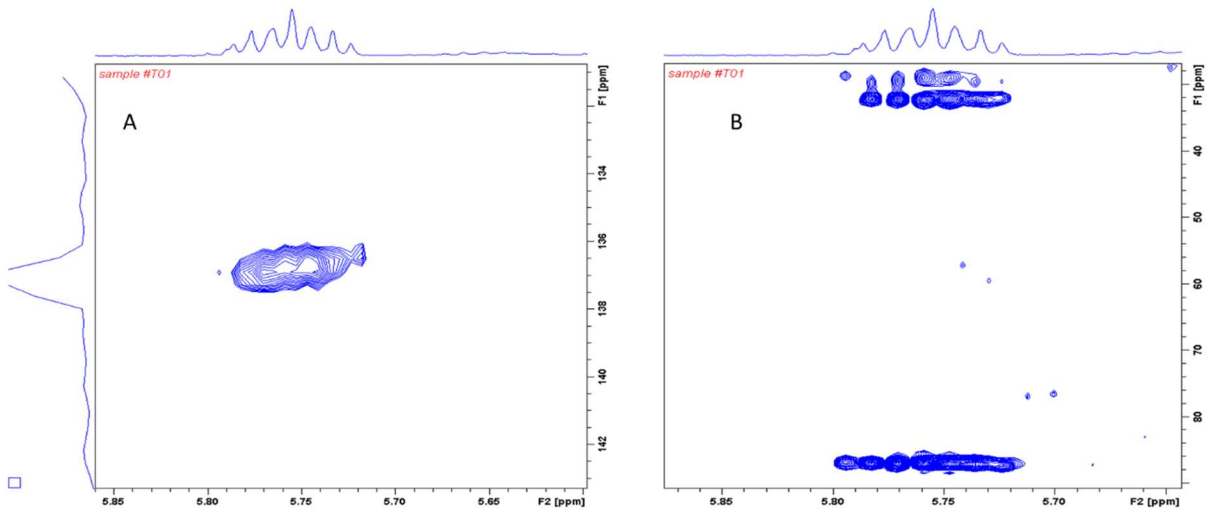

Figure S1. HSQC-DEPT (A) and HMBC (B) spectra of avocado oil in the peroxide area.

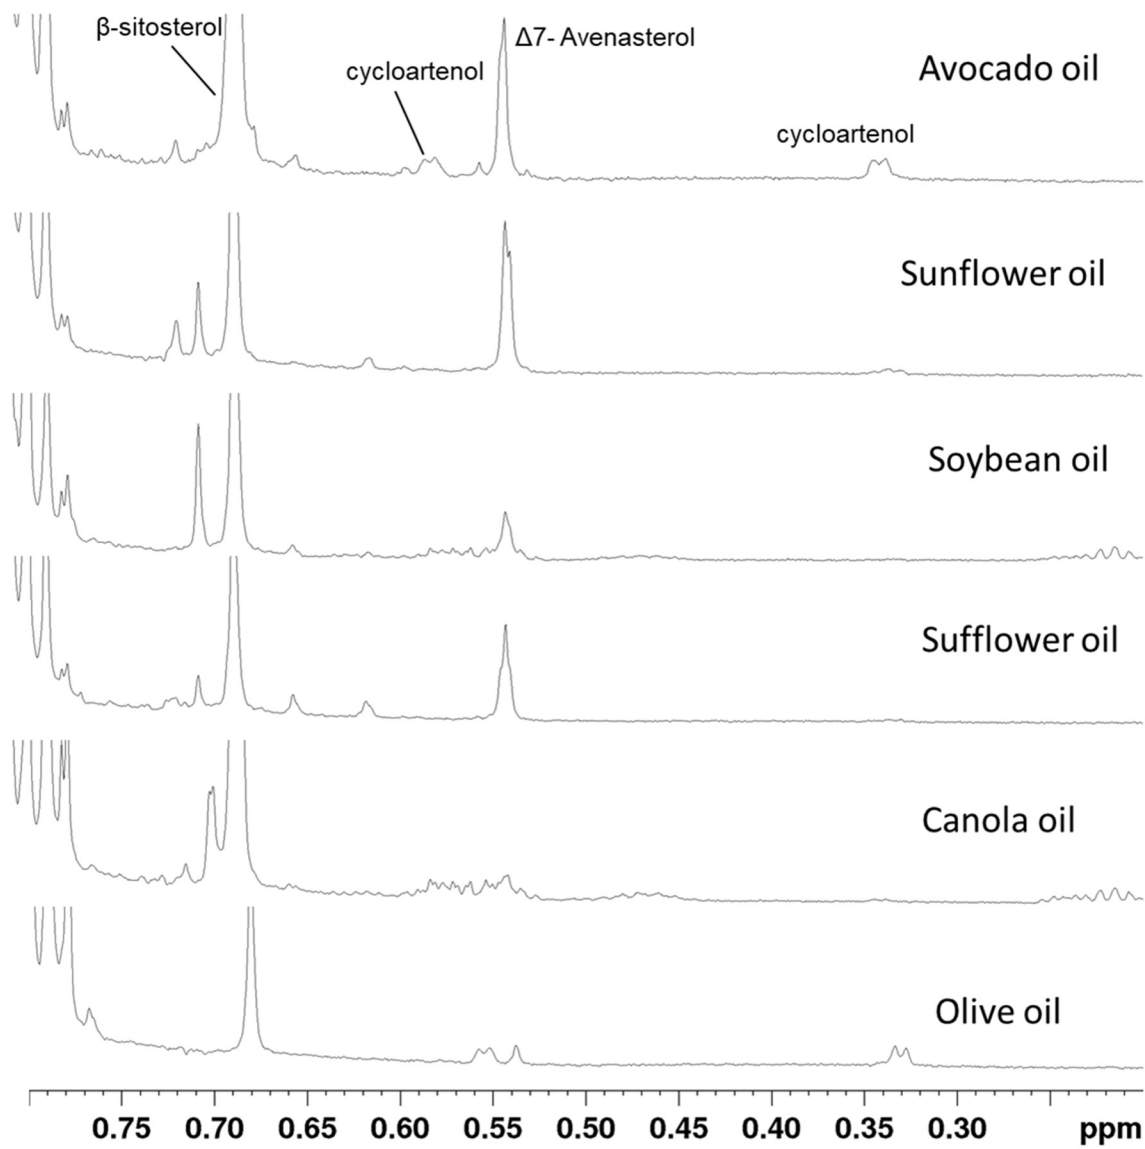

Figure S2. Comparison of the intensity-scaled 700 MHz  $^1\text{H}$ -NMR spectra of avocado oil, HO sunflower oil, soybean oil, HO safflower oil canola oil, and olive oil in the spectral area where sterols resonate.

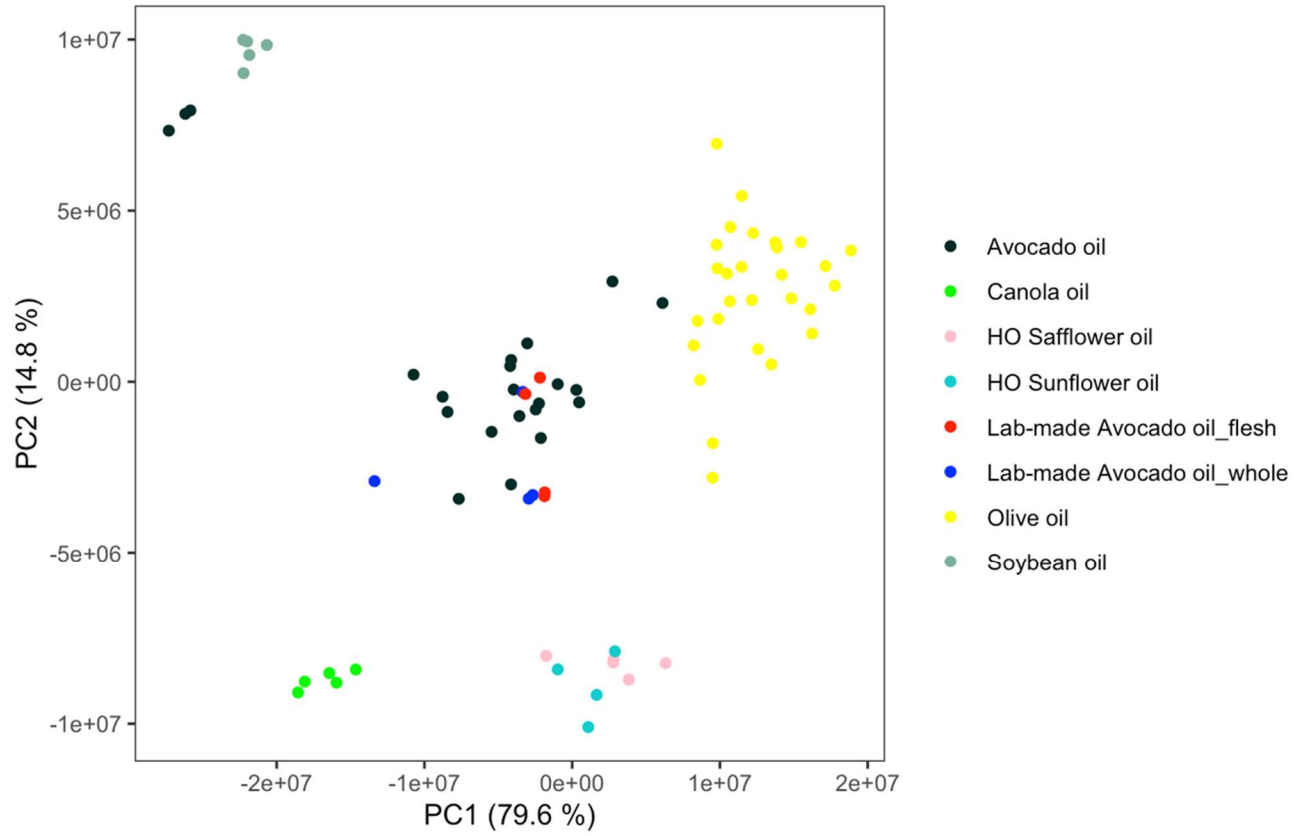

Figure S3. PCA scores-plot avocado oil, high oleic (HO) sunflower oil, soybean oil, HO safflower oil canola oil using Probabilistic Quotient Normalization (PQN) scaling.

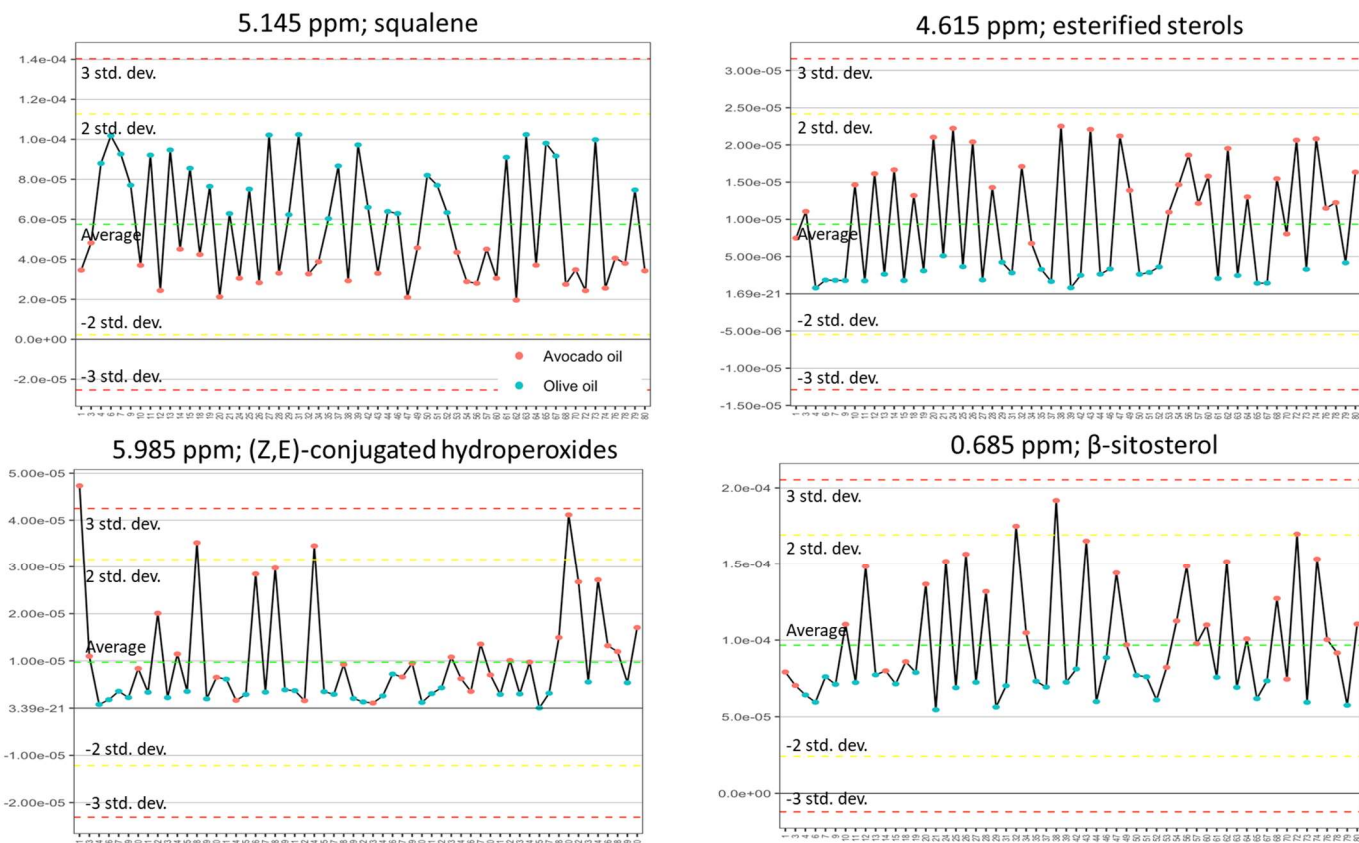

Figure S4. Variable trend plots obtained by OPLS-DA model for squalene, esterified sterols, hydroperoxides and  $\beta$ -sitosterol.

Table S1. NMR bins with a VIP score > 1, obtained by OPLS-DA.

| Bin ( $\delta$ ) | VIP        |
|------------------|------------|
| 5.145            | 2.3339093  |
| 1.015            | 2.30589463 |
| 5.155            | 2.28848021 |
| 5.105            | 2.27758019 |
| 4.605            | 2.26559212 |
| 4.615            | 2.26525195 |
| 5.115            | 2.25116449 |
| 4.625            | 2.25083701 |
| 0.945            | 2.24797577 |
| 6.285            | 2.24107534 |
| 0.675            | 2.23895845 |
| 0.805            | 2.221259   |
| 0.925            | 2.19507396 |

|       |            |
|-------|------------|
| 4.635 | 2.18774009 |
| 0.535 | 2.18363501 |
| 4.725 | 2.1674145  |
| 1.025 | 2.16032258 |
| 1.315 | 2.13523456 |
| 5.935 | 2.13459681 |
| 0.815 | 2.12151031 |
| 2.155 | 2.11647646 |
| 5.125 | 2.0978578  |
| 1.455 | 2.08838039 |
| 0.845 | 2.08820981 |
| 2.255 | 2.07717254 |
| 6.245 | 2.07571552 |
| 6.265 | 2.06751044 |
| 0.835 | 2.06302307 |
| 1.675 | 2.05984059 |
| 1.845 | 2.0588028  |
| 5.135 | 2.05320361 |
| 1.685 | 2.05038245 |
| 6.275 | 2.04414045 |
| 2.165 | 2.03481979 |
| 0.915 | 2.02171006 |
| 1.005 | 2.01107338 |
| 2.265 | 2.00977926 |
| 1.465 | 2.00791765 |
| 1.835 | 1.98279124 |
| 1.855 | 1.98028584 |
| 6.295 | 1.9372572  |
| 6.305 | 1.9264635  |
| 1.865 | 1.91226715 |
| 1.445 | 1.90151882 |
| 1.485 | 1.90148731 |
| 1.475 | 1.90094586 |
| 0.935 | 1.89830929 |
| 0.955 | 1.89316699 |
| 5.955 | 1.88781785 |
| 0.685 | 1.85867932 |
| 1.495 | 1.84409409 |
| 3.585 | 1.82064745 |
| 1.825 | 1.78381596 |
| 4.645 | 1.78041507 |

|       |            |
|-------|------------|
| 6.235 | 1.773102   |
| 5.945 | 1.76456455 |
| 1.515 | 1.76133254 |
| 2.245 | 1.75908669 |
| 4.655 | 1.74629924 |
| 9.655 | 1.7415056  |
| 1.975 | 1.73417757 |
| 1.525 | 1.73180306 |
| 2.145 | 1.71869287 |
| 1.245 | 1.71745452 |
| 0.825 | 1.71675519 |
| 4.705 | 1.71226343 |
| 9.635 | 1.70672533 |
| 5.095 | 1.68782117 |
| 3.525 | 1.68613878 |
| 3.535 | 1.68344939 |
| 5.925 | 1.68281537 |
| 1.505 | 1.68045279 |
| 3.845 | 1.67467008 |
| 1.665 | 1.65959695 |
| 0.995 | 1.65926826 |
| 1.435 | 1.65143878 |
| 1.625 | 1.6465921  |
| 1.985 | 1.64583161 |
| 2.175 | 1.64447691 |
| 1.385 | 1.61266419 |
| 3.675 | 1.61127141 |
| 2.335 | 1.61072899 |
| 6.755 | 1.6103804  |
| 1.235 | 1.60483608 |
| 6.765 | 1.60454935 |
| 3.515 | 1.59945565 |
| 4.565 | 1.59903535 |
| 1.115 | 1.59510155 |
| 2.235 | 1.58785685 |
| 1.635 | 1.57399281 |
| 2.375 | 1.57137535 |
| 3.835 | 1.57136823 |
| 7.045 | 1.56992936 |
| 3.595 | 1.56862398 |
| 3.915 | 1.55605836 |

|       |            |
|-------|------------|
| 9.235 | 1.54220562 |
| 1.815 | 1.53674806 |
| 3.605 | 1.52897524 |
| 2.445 | 1.51948957 |
| 3.665 | 1.50605802 |
| 1.105 | 1.50010337 |
| 2.455 | 1.49940499 |
| 2.365 | 1.49727238 |
| 5.985 | 1.48723274 |
| 2.185 | 1.48239951 |
| 1.655 | 1.47016386 |
| 4.595 | 1.46219057 |
| 2.355 | 1.45907677 |
| 7.055 | 1.45906232 |
| 3.615 | 1.45807075 |
| 3.705 | 1.45601811 |
| 4.245 | 1.45081123 |
| 2.385 | 1.45058699 |
| 2.345 | 1.45009512 |
| 5.995 | 1.448973   |
| 4.385 | 1.44545156 |
| 4.695 | 1.44542295 |
| 2.305 | 1.43749666 |
| 1.645 | 1.43676394 |
| 3.545 | 1.42823091 |
| 2.195 | 1.42520969 |
| 3.505 | 1.42291923 |
| 1.075 | 1.42212026 |
| 5.575 | 1.41910286 |
| 6.025 | 1.41472214 |
| 4.375 | 1.40897937 |
| 1.085 | 1.40784188 |
| 9.215 | 1.40697132 |
| 2.275 | 1.40278265 |
| 0.865 | 1.40272451 |
| 2.425 | 1.40196519 |
| 5.555 | 1.40080824 |
| 4.365 | 1.39958403 |
| 6.555 | 1.39923092 |
| 6.005 | 1.39761413 |
| 7.915 | 1.39621778 |

|       |            |
|-------|------------|
| 6.015 | 1.39524269 |
| 2.225 | 1.39466289 |
| 6.545 | 1.39452197 |
| 6.255 | 1.39433312 |
| 4.225 | 1.39368704 |
| 2.435 | 1.3886441  |
| 7.905 | 1.3881613  |
| 1.265 | 1.38782418 |
| 6.045 | 1.38686612 |
| 6.575 | 1.38625448 |
| 4.095 | 1.3836402  |
| 5.585 | 1.38056124 |
| 4.415 | 1.38051101 |
| 9.515 | 1.37769254 |
| 2.465 | 1.37637253 |
| 4.735 | 1.37565062 |
| 4.395 | 1.37336293 |
| 4.235 | 1.36771889 |
| 6.565 | 1.36726391 |
| 4.085 | 1.36305118 |
| 1.395 | 1.36021401 |
| 4.925 | 1.35928921 |
| 6.035 | 1.35633643 |
| 4.195 | 1.35055544 |
| 6.055 | 1.35052461 |
| 2.475 | 1.35011009 |
| 5.565 | 1.34922912 |
| 9.645 | 1.34805016 |
| 1.095 | 1.34559175 |
| 4.325 | 1.34338459 |
| 3.945 | 1.34203715 |
| 6.225 | 1.34126692 |
| 4.425 | 1.3377073  |
| 1.375 | 1.33588009 |
| 4.185 | 1.33490544 |
| 1.875 | 1.32829643 |
| 3.935 | 1.32747721 |
| 6.595 | 1.32724818 |
| 3.875 | 1.32593399 |
| 3.695 | 1.32540044 |
| 4.355 | 1.32324024 |



|       |            |
|-------|------------|
| 3.735 | 1.32041198 |
| 1.955 | 1.32031668 |
| 3.925 | 1.31594375 |
| 6.585 | 1.31330098 |
| 5.475 | 1.3130591  |
| 3.575 | 1.31061911 |
| 5.485 | 1.31056443 |
| 5.545 | 1.30729365 |
| 5.975 | 1.30391663 |
| 3.975 | 1.30308876 |
| 5.285 | 1.30259868 |
| 4.175 | 1.30256373 |
| 1.945 | 1.3019471  |
| 5.465 | 1.30055468 |
| 6.315 | 1.29696758 |
| 5.175 | 1.29661092 |
| 4.405 | 1.28840798 |
| 5.495 | 1.28650909 |
| 3.725 | 1.28620283 |
| 4.315 | 1.28482902 |
| 4.755 | 1.2825481  |
| 7.895 | 1.27683764 |
| 2.205 | 1.27589718 |
| 5.505 | 1.26748041 |
| 2.115 | 1.26627955 |
| 4.075 | 1.26625801 |
| 1.605 | 1.26169944 |
| 2.135 | 1.26061689 |
| 5.915 | 1.26017669 |
| 2.325 | 1.25939947 |
| 4.065 | 1.25611909 |
| 4.875 | 1.25448742 |
| 1.255 | 1.252741   |
| 3.685 | 1.24774251 |
| 0.875 | 1.2477052  |
| 7.925 | 1.2400917  |
| 5.515 | 1.23637218 |
| 5.965 | 1.23322712 |
| 1.425 | 1.22245781 |
| 1.225 | 1.22218696 |
| 4.555 | 1.2182103  |

|       |            |
|-------|------------|
| 4.685 | 1.21775694 |
| 4.935 | 1.21400999 |
| 2.415 | 1.21363244 |
| 7.965 | 1.21212651 |
| 3.885 | 1.21118007 |
| 3.455 | 1.20747704 |
| 9.685 | 1.20719127 |
| 5.335 | 1.20550707 |
| 2.485 | 1.2011275  |
| 3.825 | 1.19991668 |
| 5.075 | 1.19762755 |
| 2.125 | 1.18874315 |
| 4.865 | 1.18767809 |
| 0.795 | 1.18162361 |
| 1.595 | 1.17765788 |
| 1.405 | 1.17637016 |
| 4.745 | 1.17612012 |
| 4.215 | 1.17479686 |
| 5.425 | 1.17472515 |
| 5.165 | 1.17251605 |
| 0.895 | 1.17190755 |
| 4.055 | 1.17111422 |
| 1.135 | 1.16850324 |
| 7.865 | 1.16549964 |
| 1.345 | 1.16452029 |
| 9.545 | 1.16323826 |
| 1.055 | 1.16059282 |
| 7.955 | 1.15913917 |
| 6.065 | 1.15727999 |
| 5.645 | 1.15465305 |
| 5.055 | 1.15343682 |
| 2.295 | 1.15243532 |
| 1.995 | 1.15241271 |
| 2.105 | 1.1501143  |
| 7.975 | 1.14817568 |
| 3.565 | 1.14689181 |
| 2.215 | 1.14453339 |
| 5.065 | 1.14055831 |
| 7.985 | 1.13652496 |
| 3.985 | 1.13115925 |
| 5.455 | 1.13102634 |

|       |            |
|-------|------------|
| 3.995 | 1.13051387 |
| 0.905 | 1.12695947 |
| 2.695 | 1.12067219 |
| 1.365 | 1.11799367 |
| 4.915 | 1.11760542 |
| 7.875 | 1.11208353 |
| 3.445 | 1.11190012 |
| 2.685 | 1.11086575 |
| 1.705 | 1.10787029 |
| 2.665 | 1.107357   |
| 3.285 | 1.10407894 |
| 4.045 | 1.10271596 |
| 7.855 | 1.10136915 |
| 3.465 | 1.10025621 |
| 2.785 | 1.09978226 |
| 4.675 | 1.09885818 |
| 1.355 | 1.09689713 |
| 2.925 | 1.09387257 |
| 4.205 | 1.09341546 |
| 5.435 | 1.09158465 |
| 7.595 | 1.0871188  |
| 2.035 | 1.08621455 |
| 2.775 | 1.0847772  |
| 4.165 | 1.08471904 |
| 2.675 | 1.08455449 |
| 4.105 | 1.08420271 |
| 3.855 | 1.07870939 |
| 4.975 | 1.07866051 |
| 2.905 | 1.07568424 |
| 1.555 | 1.07358656 |
| 9.765 | 1.07247014 |
| 2.935 | 1.0718498  |
| 1.065 | 1.06709359 |
| 3.865 | 1.06457172 |
| 3.555 | 1.0636735  |
| 1.295 | 1.063026   |
| 3.785 | 1.06142817 |
| 1.305 | 1.05731376 |
| 4.335 | 1.05566856 |
| 2.065 | 1.05472738 |
| 2.765 | 1.05307644 |

|       |            |
|-------|------------|
| 2.865 | 1.05192713 |
| 3.795 | 1.05112954 |
| 5.355 | 1.04843541 |
| 1.275 | 1.04750058 |
| 2.855 | 1.04660853 |
| 2.045 | 1.04486894 |
| 3.655 | 1.04462357 |
| 2.655 | 1.04204345 |
| 3.745 | 1.04043158 |
| 6.075 | 1.03932445 |
| 4.825 | 1.03864588 |
| 2.945 | 1.03856517 |
| 4.835 | 1.03716162 |
| 2.095 | 1.03637231 |
| 1.415 | 1.03587812 |
| 2.005 | 1.03492708 |
| 4.255 | 1.03374455 |
| 2.055 | 1.03346095 |
| 5.375 | 1.0286436  |
| 5.415 | 1.02768041 |
| 5.525 | 1.02432214 |
| 7.885 | 1.01702939 |
| 2.755 | 1.0154229  |
| 4.815 | 1.01415979 |
| 7.945 | 1.01259475 |
| 2.645 | 1.01207186 |
| 7.035 | 1.00762596 |
| 2.955 | 1.00704192 |
| 7.845 | 1.00375227 |
| 2.405 | 1.00324951 |
| 1.725 | 1.00207804 |
| 4.795 | 0.99776349 |
| 0.555 | 0.99674913 |

Table S2. Confusion matrix obtained by random forest analysis.

|         | <b>Avocado</b> | <b>Olive</b> | <b>class.error</b> |
|---------|----------------|--------------|--------------------|
| Avocado | 30             | 0            | 0.0                |
| Olive   | 0              | 28           | 0.0                |
